# Supplementary material for: Increased serum levels of fractalkine and mobilisation of CD34+CD45− endothelial progenitor cells in systemic sclerosis
Source: Springer Nature journal article supplement (doi:10.1186/s13075-017-1271-7), 2017-03-20

**Figure S1**

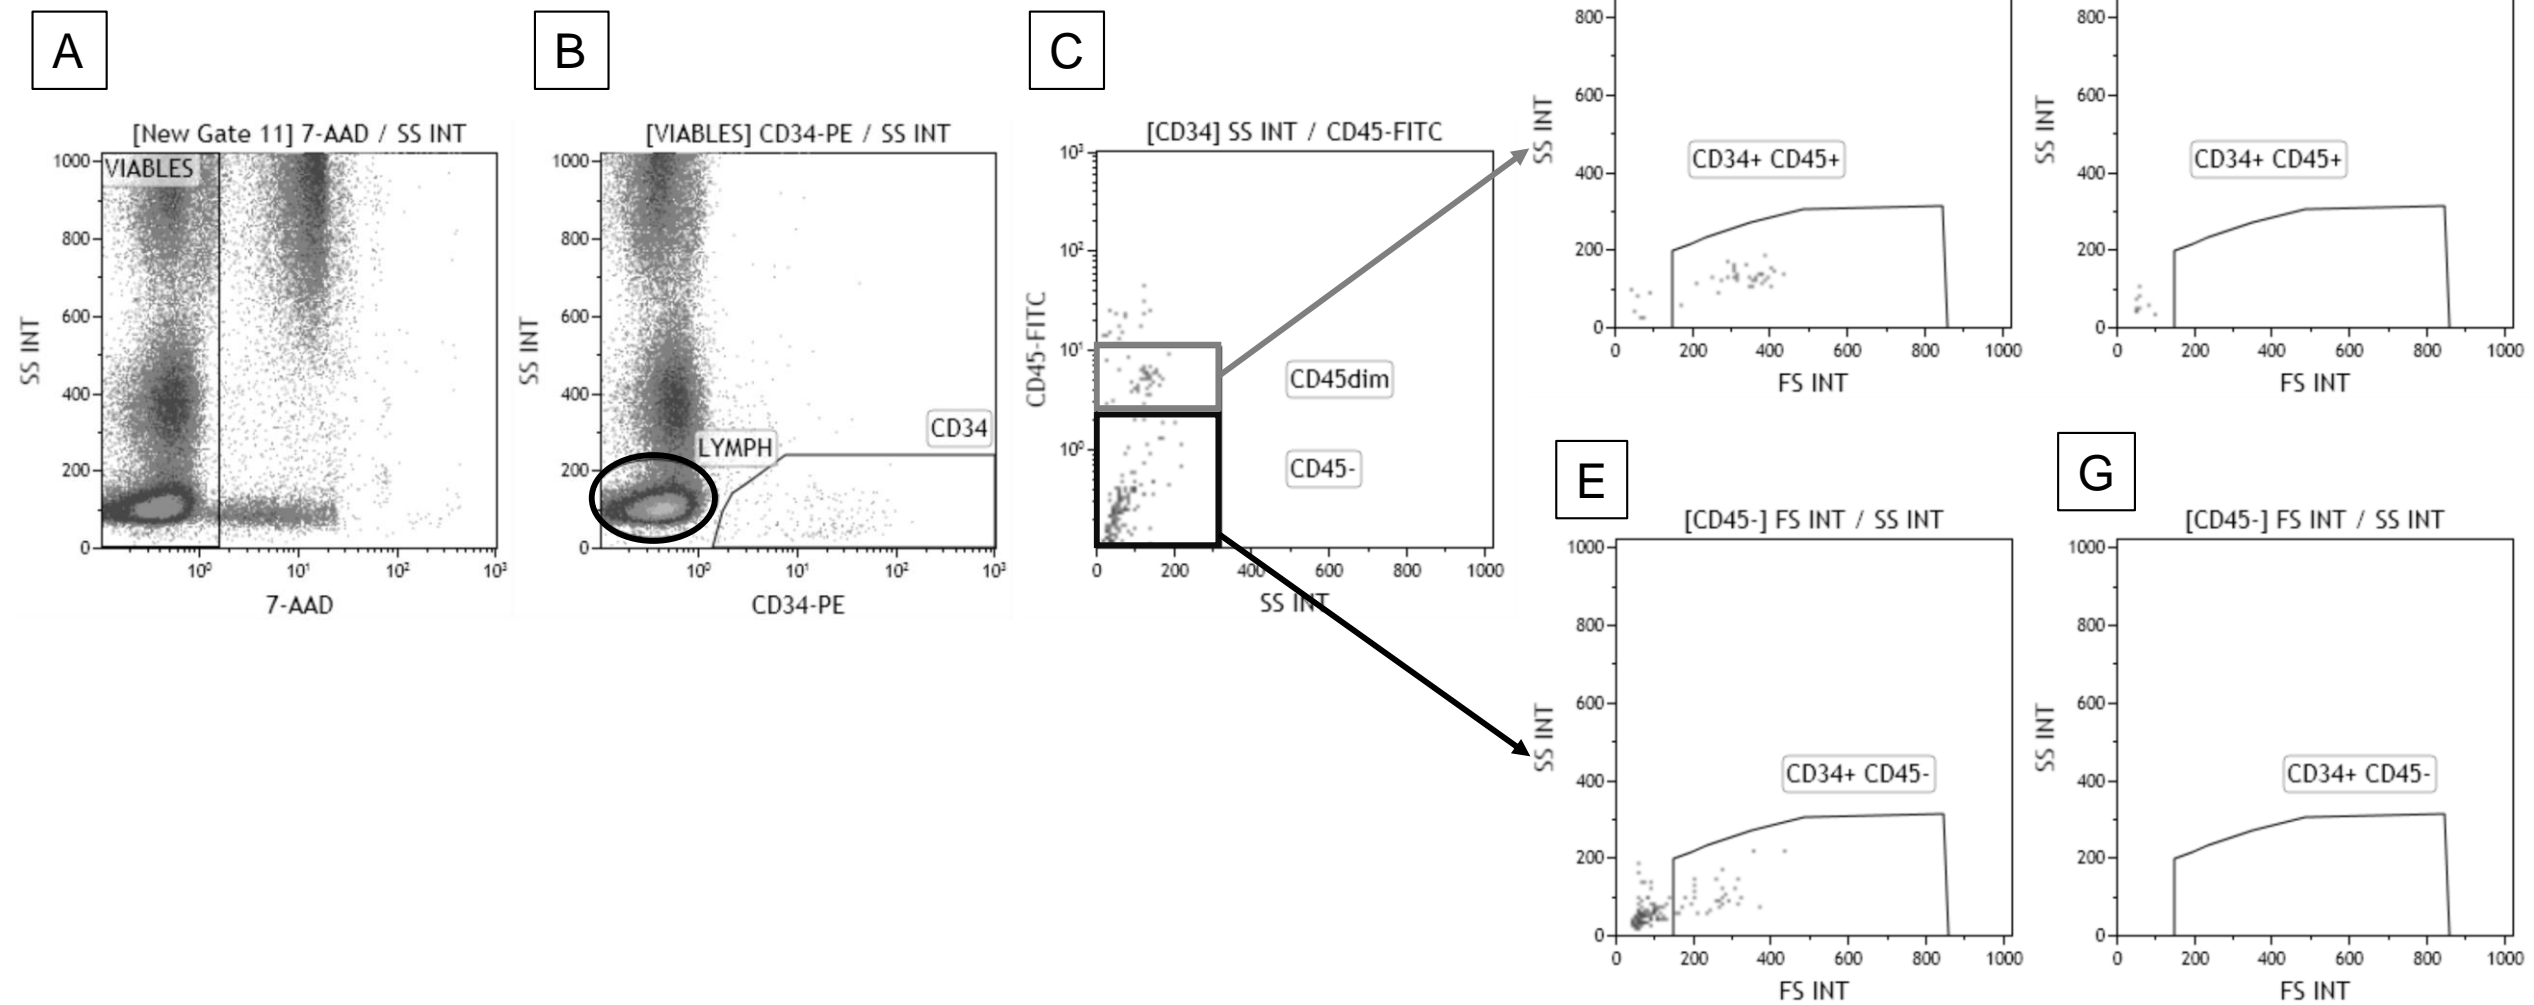

Supplement: MOESM2 [file 12157872]
